# Supplementary material for: Ti4-Decorated B/N-doped graphene as a high-capacity hydrogen storage material: a DFT study
Source: Royal Society of Chemistry journal article supplement (doi:10.1039/d1dt01498f), 2021-01-01
Supplement: d1dt01498f1.pdf [file d1dt01498f1.pdf]

**Supplementary Information for**

**Ti<sub>4</sub>-Decorated B/N-Doped Graphene as High-**

**Capacity Hydrogen Storage Material: A DFT Study**

Ratchadaree Intayot,<sup>1</sup> Chompoonut Rungnim,<sup>2</sup> Supawadee Namungruk,<sup>3</sup>  
Nuttapon Yodsin,<sup>1</sup> and Siriporn Jungsuttiwong<sup>1,\*</sup>

<sup>1</sup> *Center for Organic Electronic and Alternative Energy, Department of Chemistry and  
Center for Innovation in Chemistry, Faculty of Science, Ubon Ratchathani University,  
Ubon Ratchathani 34190, Thailand.*

<sup>2</sup> *NSTDA Supercomputer Center (ThaiSC), National Electronics and Computer Technology  
Center, National Science and Technology Development Agency, Thailand Science Park,  
Klong Luang, Pathum Thani 12120, Thailand*

<sup>3</sup> *National Nanotechnology Center, 130 Thailand Science Park, Klong Luang, Pathumthani  
12120, Thailand*

*\*Corresponding author. E-mail: [siriporn.j@ubu.ac.th](mailto:siriporn.j@ubu.ac.th) (S.J.)*

## Contents

**Fig. S1.** The isosurfaces of the EDD for Ti decorated graphene (a) Ti/Gr, (b) Ti/BGr, and (c) Ti/NGr are presented. In the EDD plots, the red and yellow colors represent electron accumulation and depletion regions, respectively. The isosurfaces of EDD is taken to be  $0.02 \text{ e}/\text{\AA}^3$ .

**Fig. S2.** All possible optimized configurations of the  $\text{Ti}_4$  cluster decorated on pristine graphene.

**Fig. S3.** All possible optimized configurations of the  $\text{Ti}_4$  cluster decorated on B-doped graphene.

**Fig. S4.** All possible optimized configurations of the  $\text{Ti}_4$  cluster decorated on N-doped graphene.

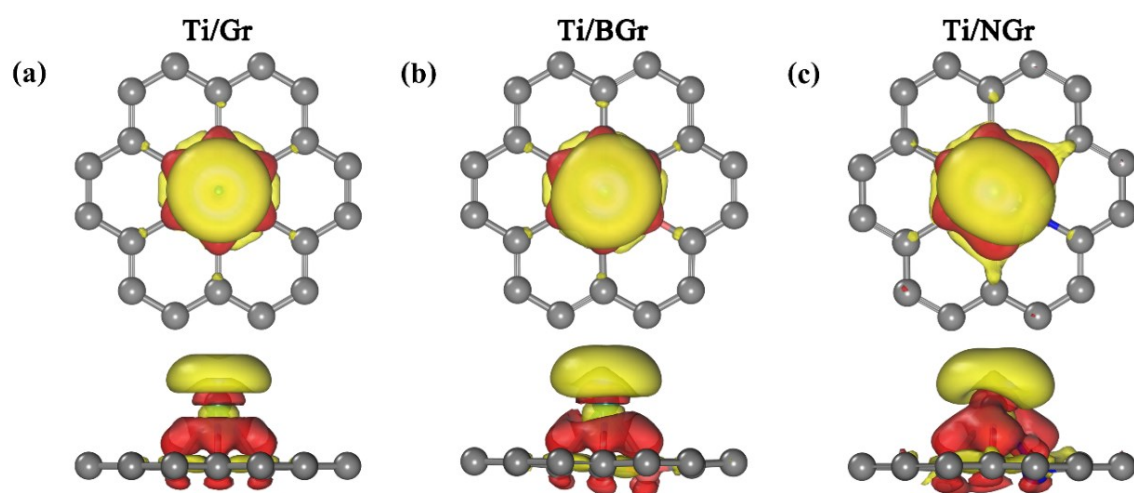

**Fig. S1.** The isosurfaces of the EDD for Ti decorated graphene (a) Ti/Gr, (b) Ti/BGr, and (c) Ti/NGr are presented. In the EDD plots, the red and yellow colors represent electron accumulation and depletion regions, respectively. The isosurfaces of EDD is taken to be  $0.02 \text{ e}/\text{\AA}^3$ .

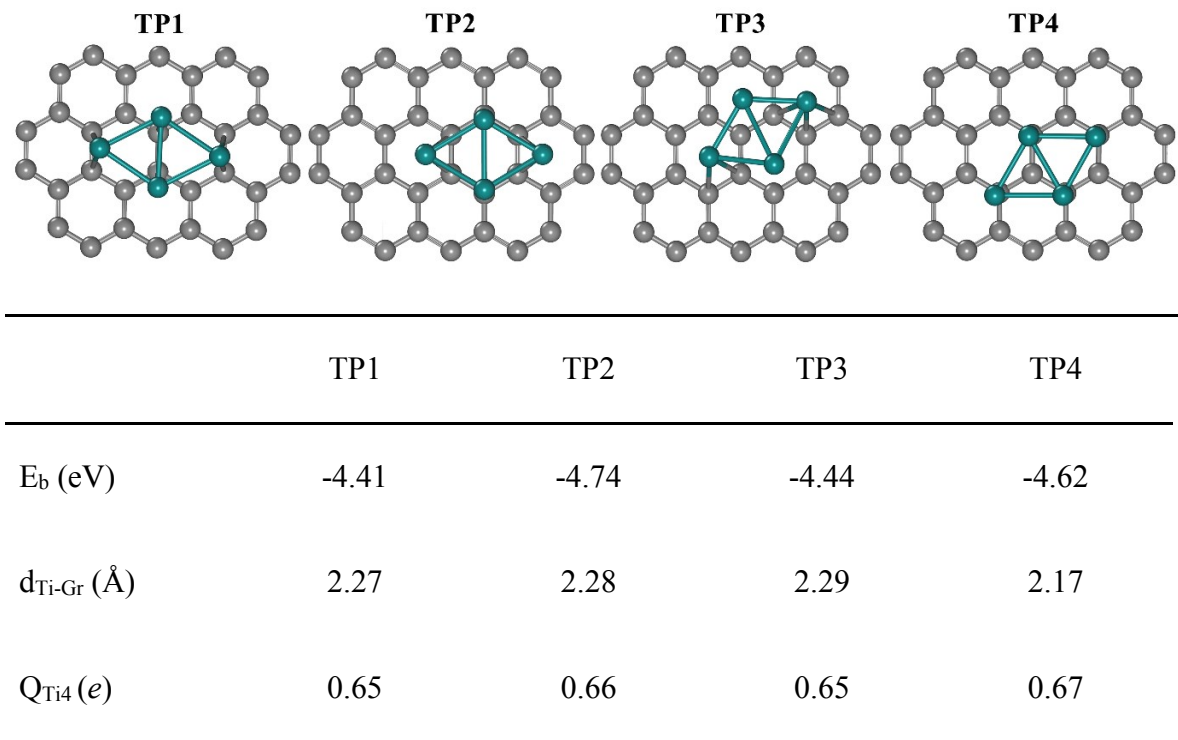

**Fig. S2.** All possible optimized configurations of the  $\text{Ti}_4$  cluster decorated on pristine graphene.

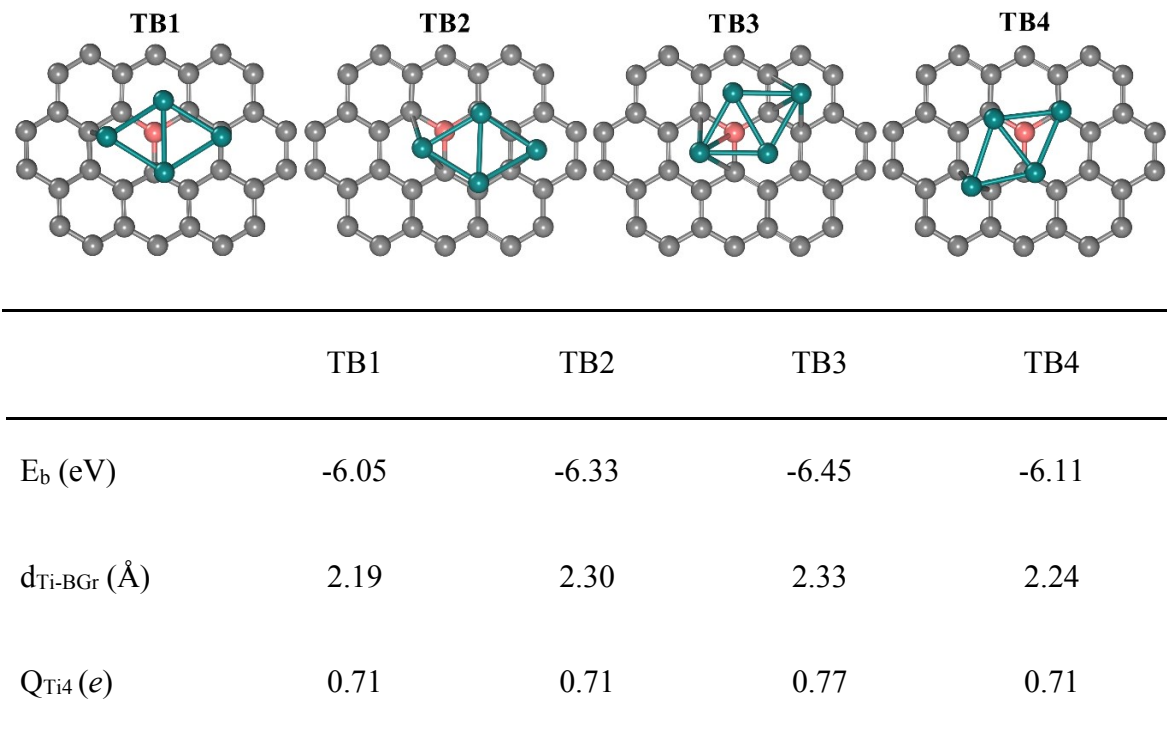

**Fig. S3.** All possible optimized configurations of the  $\text{Ti}_4$  cluster decorated on B-doped graphene.

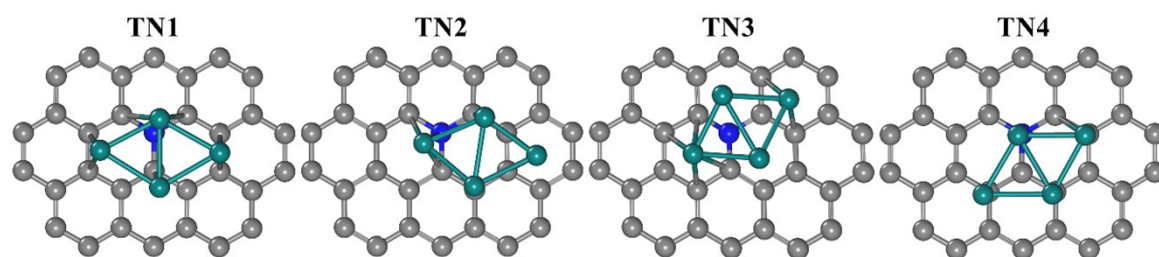

|                          | TN1   | TN2   | TN3   | TN4   |
|--------------------------|-------|-------|-------|-------|
| $E_b$ (eV)               | -4.33 | -4.52 | -4.33 | -4.79 |
| $d_{\text{Ti-NGr}}$ (Å)  | 2.25  | 2.24  | 2.29  | 2.18  |
| $Q_{\text{Ti4}}$ ( $e$ ) | 0.65  | 0.65  | 0.64  | 0.67  |

**Fig. S4.** All possible optimized configurations of the  $\text{Ti}_4$  cluster decorated on N-doped graphene.
